# Supplementary material for: UAV hyperspectral imaging for multiscale assessment of Landsat 9 snow grain size and albedo
Source: Frontiers journal article supplement (doi:10.3389/frsen.2022.1038287), 2023-01-12
Supplement: Image_13.pdf [file Image_13.pdf]

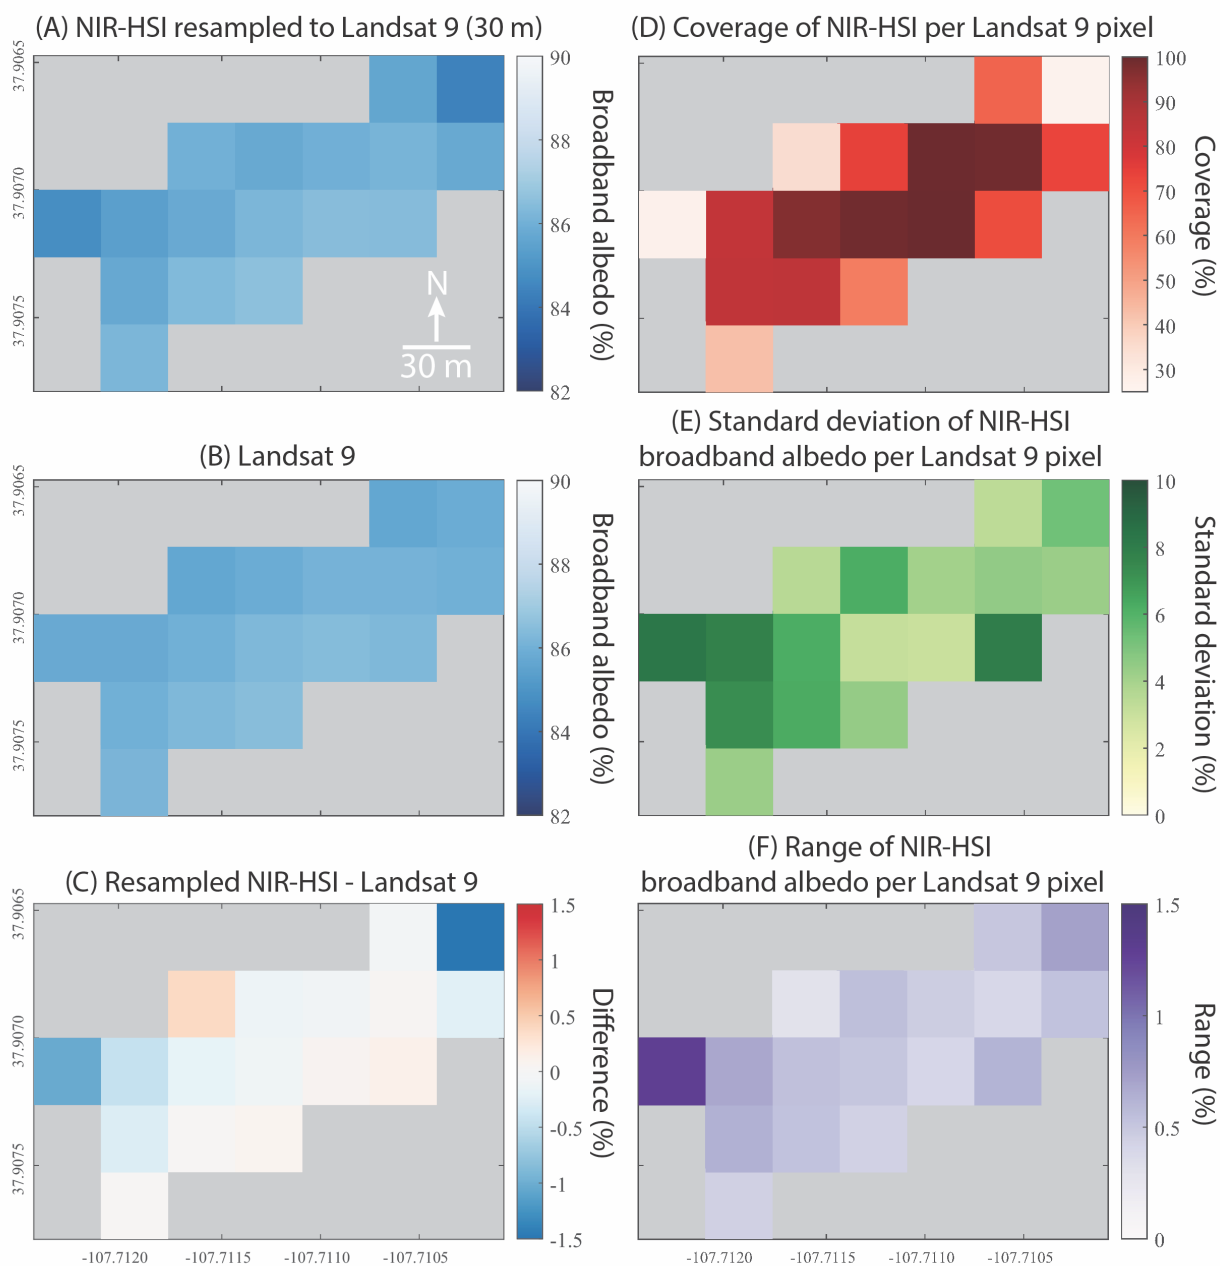

**Supplementary Figure 1. Comparison of (A) resampled (downscaled) NIR-HSI snow albedo map to (B) Landsat 9 OLI albedo map, with the difference map shown in (C). Landsat 9 snow albedo zonal statistics based on high resolution UAV-HSI snow albedo retrieval; (A) percentage of UAV-HSI pixel coverage in each Landsat pixel, (B) standard deviation of albedo per Landsat 9 pixel based on UAV-HSI, and (C) the range of albedo size per Landsat 9 pixel based on UAV-HSI.**
